# Supplementary material for: A flexible wearable sensor based on anti-swelling conductive hydrogels for underwater motion posture visualization assisted by deep learning
Source: Royal Society of Chemistry journal article supplement (doi:10.1039/d4ta02979h), 2024-01-01
Supplement: d4ta02979h2.pdf [file d4ta02979h2.pdf]

## **Supporting Information**

### **Flexible wearable sensor based on anti-swelling conductive hydrogel for underwater motion posture visualization assisted by deep learning**

**Mingyu Qi, Dongzhi Zhang\*, Yihong Guo, Hao Zhang, Jiahui Shao, Yanhua Ma,**

**Chunqing Yang, Ruiyuan Mao**

College of Control Science and Engineering, China University of Petroleum (East  
China), Qingdao 266580, China

\*Corresponding author: Dongzhi Zhang

E-mail address: dzzhang@upc.edu.cn

Tel: +86-532-86982928

Fax: +86-532-86981335

## Figure captions

**Figure S1.** (a) Loading/unloading curves of hydrogel at 100% tensile strain for 30 consecutive cycles. (b) Cyclic loading/unloading energy dissipation at 100% tensile strain. (c) Loading/unloading curves of hydrogel at 50% compressive strain for 30 consecutive cycles. (d) Loading/unloading energy dissipation at 50% compressive strain.

**Figure S2.** (a) Ionic conductivity of hydrogels with different SBMA contents. (b) Electrochemical impedance spectroscopy (EIS) of hydrogels with different SBMA contents.

**Figure S3.** Repeated response curves of PABC strain sensor under different strains.

**Figure S4.** Schematic diagram of the effect of hydrogel stretching on the brightness variation of LED bulbs.

**Figure S5.** Brightness change of LED bulb after cutting and self-healing hydrogel connected to a circuit.

**Figure S6.** (a) Loading/unloading curves of hydrogels immersed for five days at 100% tensile strain for 30 consecutive cycles. (b) Tensile release response curves of hydrogels in the 0-100% strain range after five days of immersion.

## Supporting Movie

**Movie 1.** Real-time wireless sensing testing of PABC hydrogel sensors in air and underwater environments.

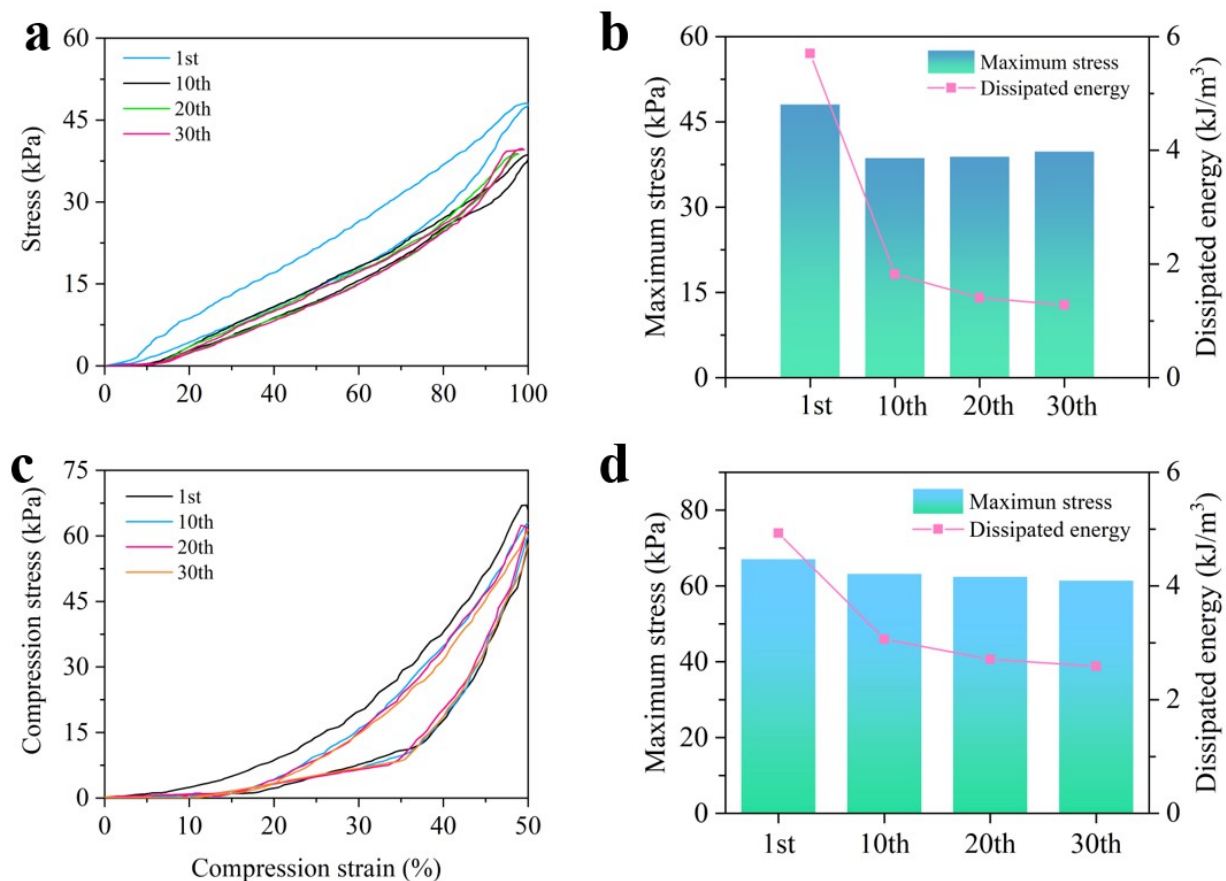

**Figure S1.** (a) Loading/unloading curves of hydrogel at 100% tensile strain for 30 consecutive cycles. (b) Cyclic loading/unloading energy dissipation at 100% tensile strain. (c) Loading/unloading curves of hydrogel at 50% compressive strain for 30 consecutive cycles. (d) Loading/unloading energy dissipation at 50% compressive strain.

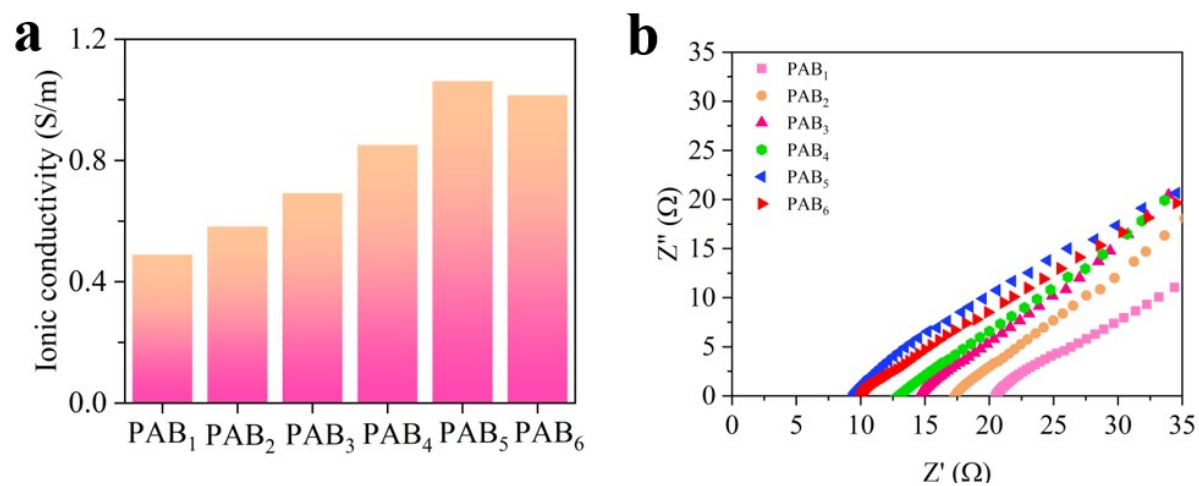

**Figure S2.** (a) Ionic conductivity of hydrogels with different SBMA contents. (b) Electrochemical impedance spectroscopy (EIS) of hydrogels with different SBMA contents.

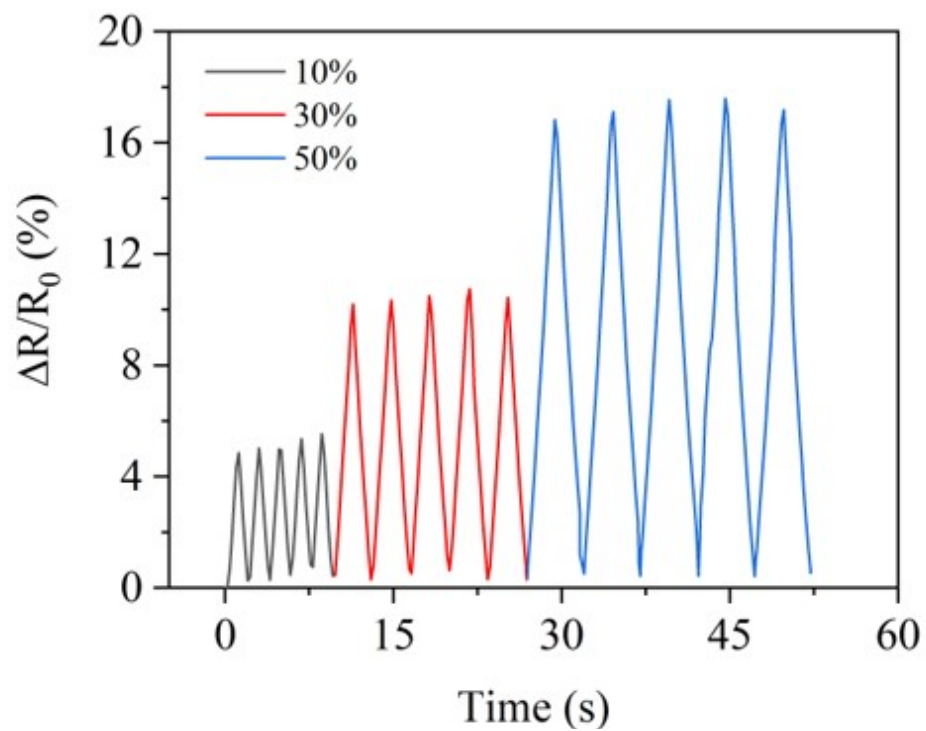

**Figure S3.** Repeated response curves of PABC strain sensor under different strains.

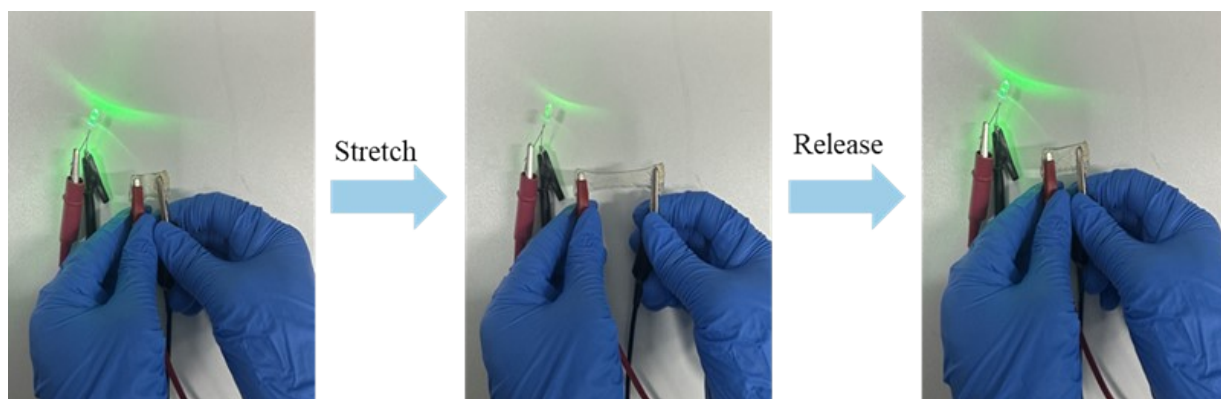

**Figure S4.** Schematic diagram of the effect of hydrogel stretching on the brightness variation of LED bulbs.

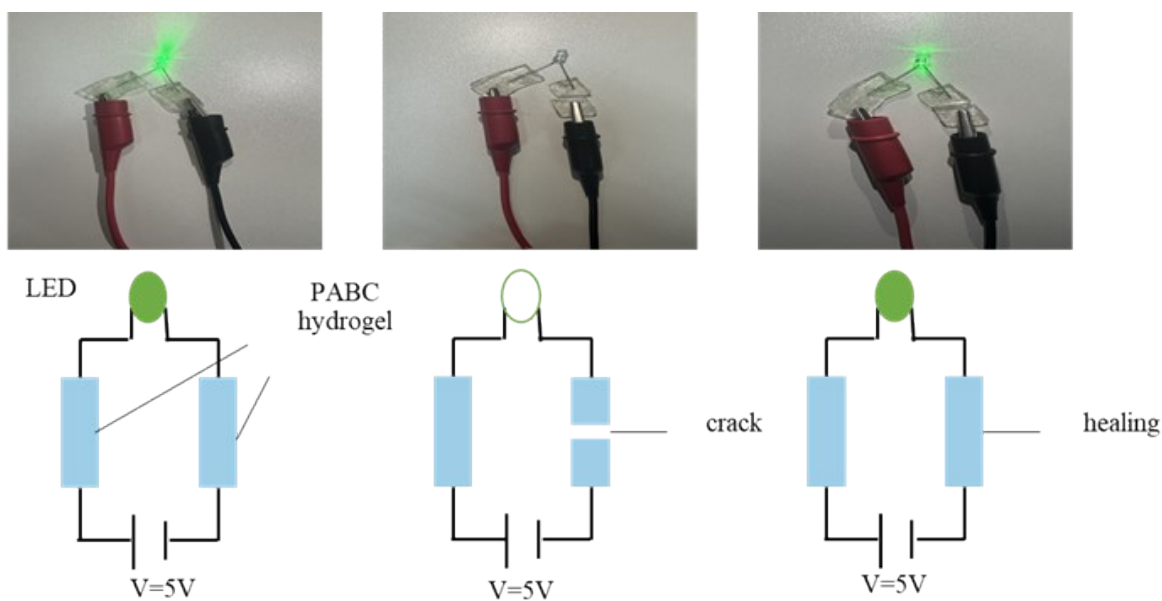

**Figure S5.** Brightness change of LED bulb after cutting and self-healing hydrogel connected to a circuit.

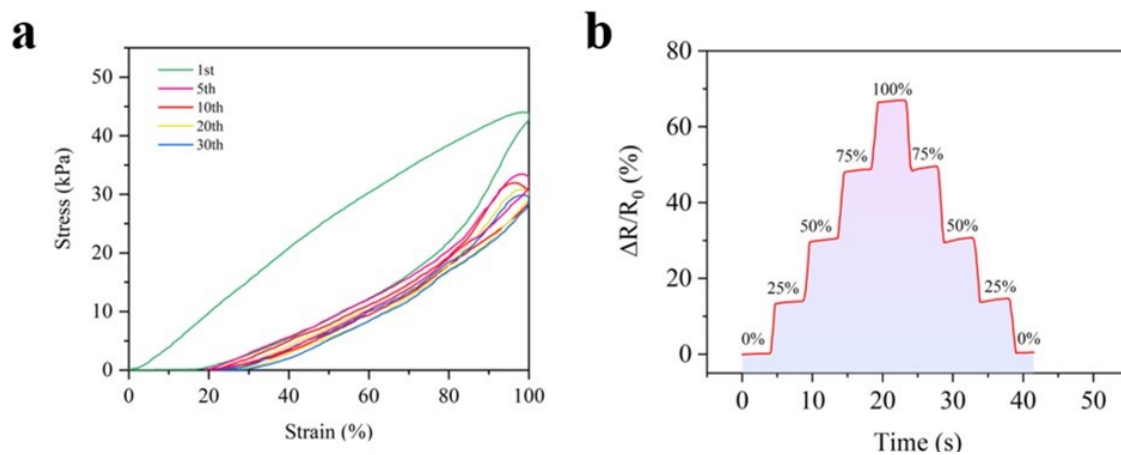

**Figure S6.** (a) Loading/unloading curves of hydrogels immersed for five days at 100% tensile strain for 30 consecutive cycles. (b) Tensile release response curves of hydrogels in the 0-100% strain range after five days of immersion.
